# Supplementary material for: Anti-Inflammatory Activity of 3, 5-Diprenyl-4-hydroxyacetophenone Isolated from Ageratina pazcuarensis
Source: MDPI journal article supplement (doi:10.3390/ijms232315012), 2022-11-30
Supplement: s1 [file s1]

## Anti-inflammatory activity of 3, 5-diprenyl-4-hydroxyacetophenone isolated from *Ageratina pascuarensis*.

Sarai Rojas-Jiménez, María Salud Pérez-Gutiérrez, Ernesto Sánchez-Mendoza, Rubria Marlene Martínez-Casares, Nimsi Campos Xolalpa, María Guadalupe Valladares-Cisneros, David Osvaldo Salinas-Sánchez.

Spectroscopy and Spectrometry data of 3, 5-diprenyl-4-hydroxyacetophenone.

- NMR Spectra

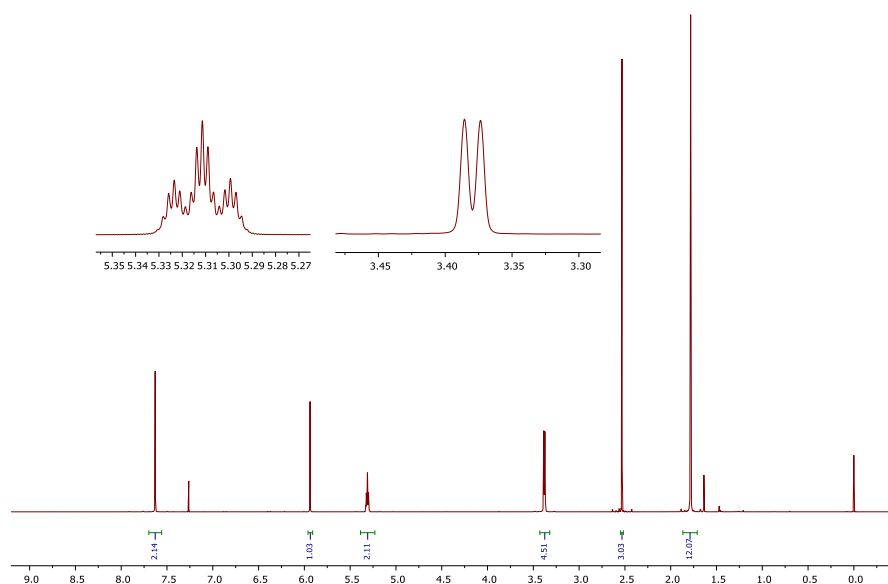

Figure S1, NMR-<sup>1</sup>H spectrum.

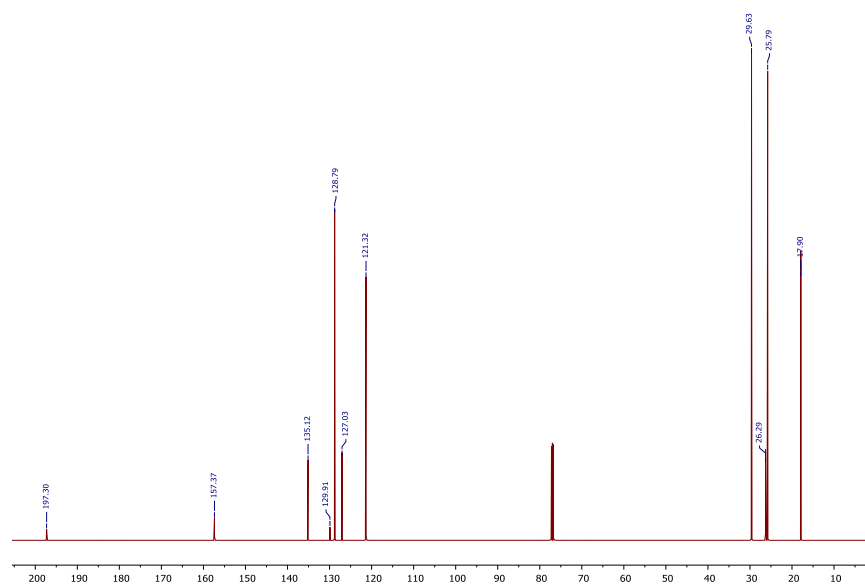

Figure S2, NMR-<sup>13</sup>C spectrum.

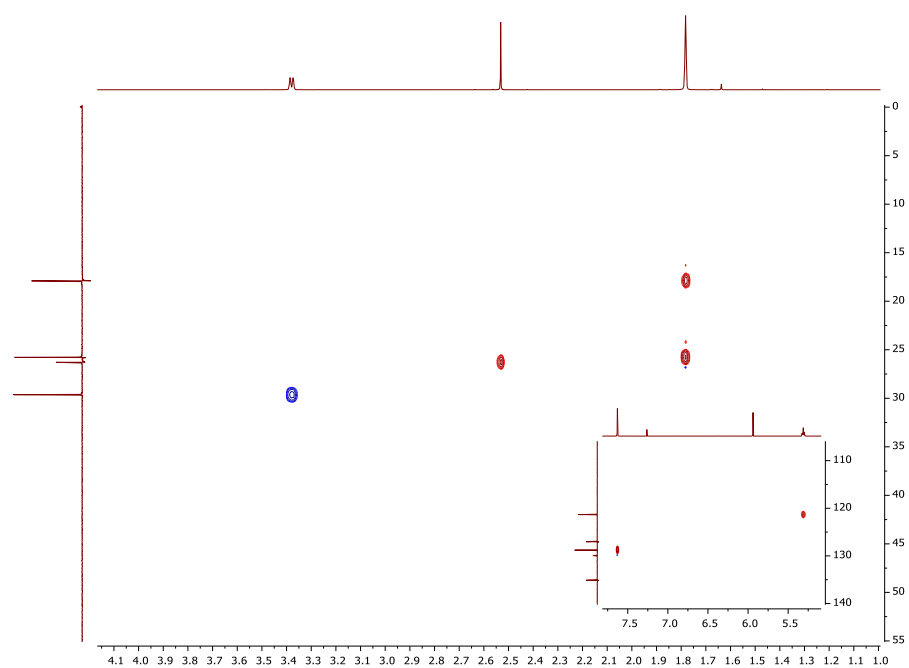

Figure S3, gHSQC NMR spectrum.

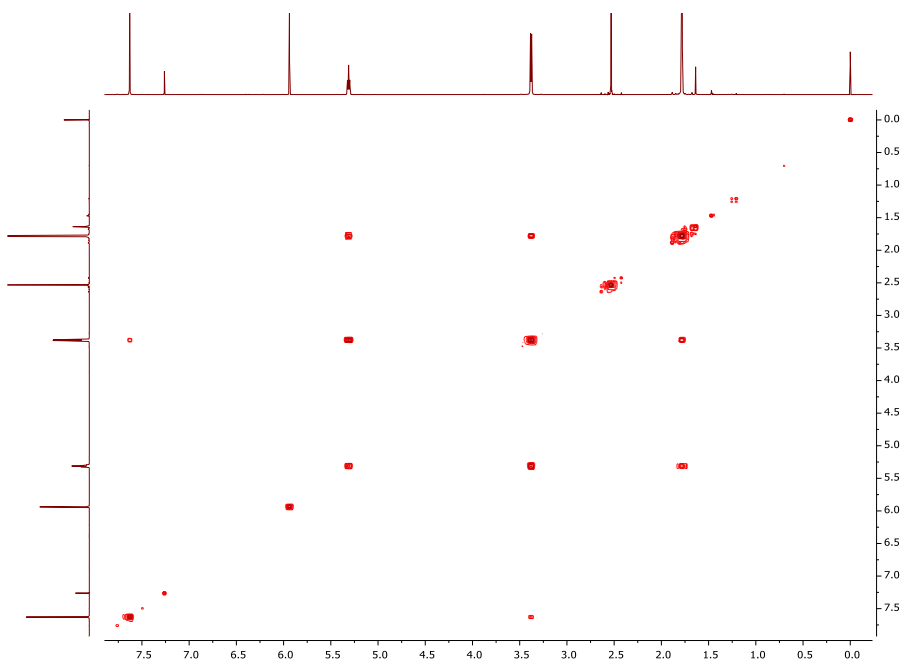

Figure S4, COSY NMR spectrum.

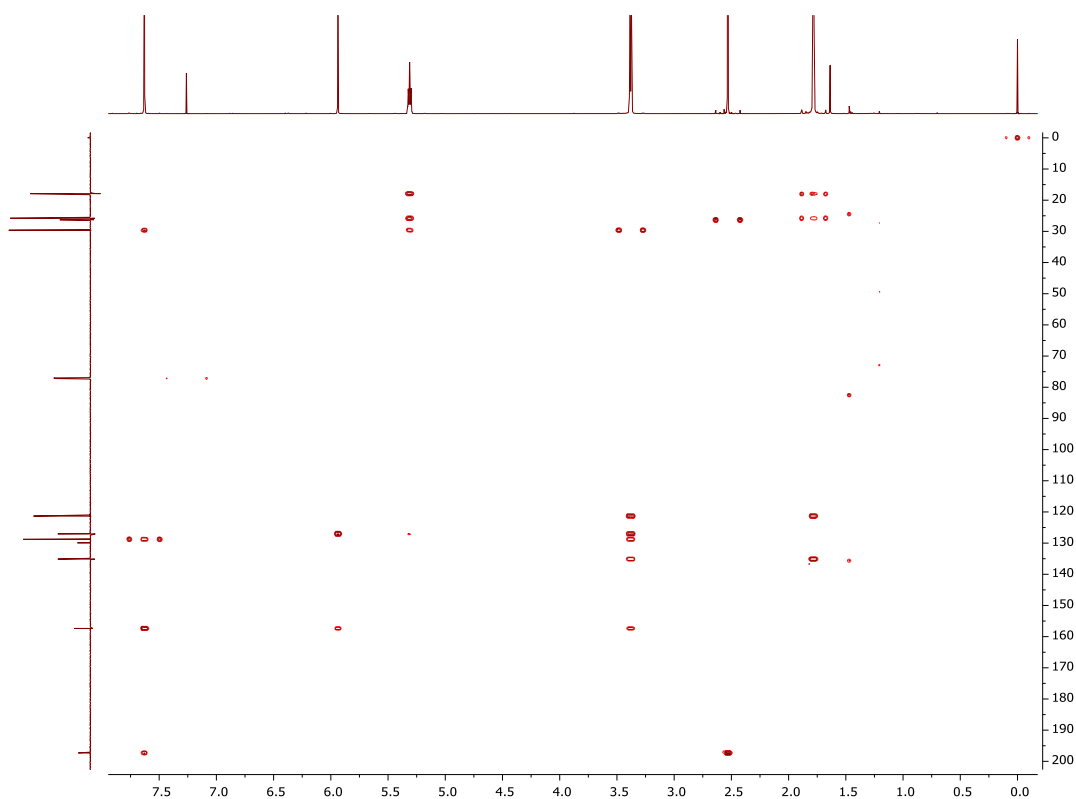

Figure S5, gHMBC NMR spectrum.

## - IR-Data

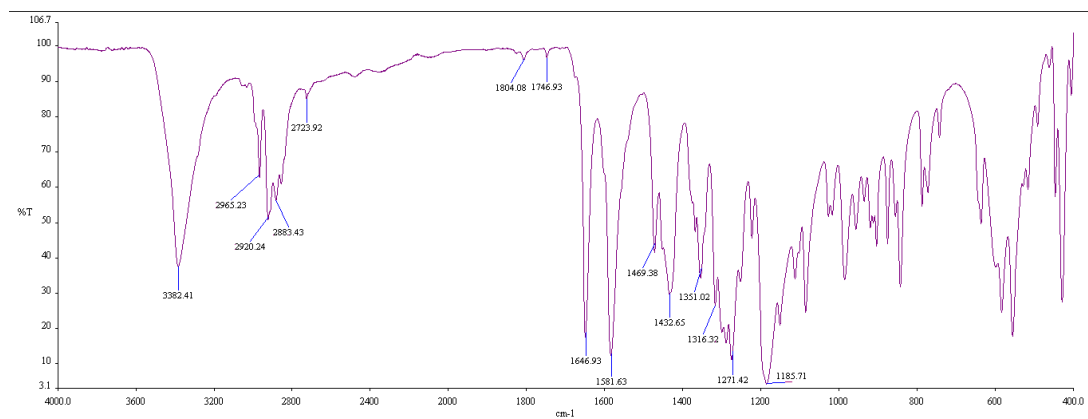

Figure S6. FT-IR Spectrum

- **Gas Chromatography and Mass Spectrometry Data**

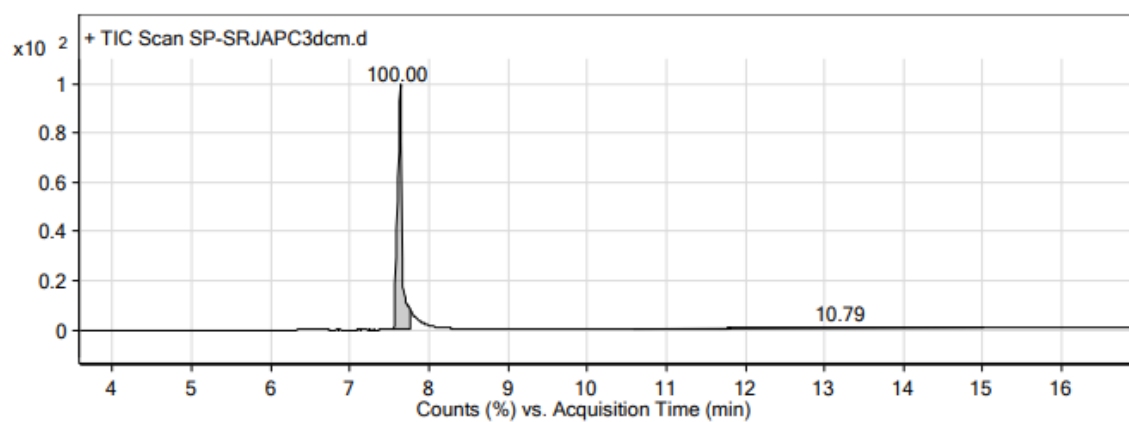

Figure S7. Gas chromatogram.  $T_R=7.8$  min.

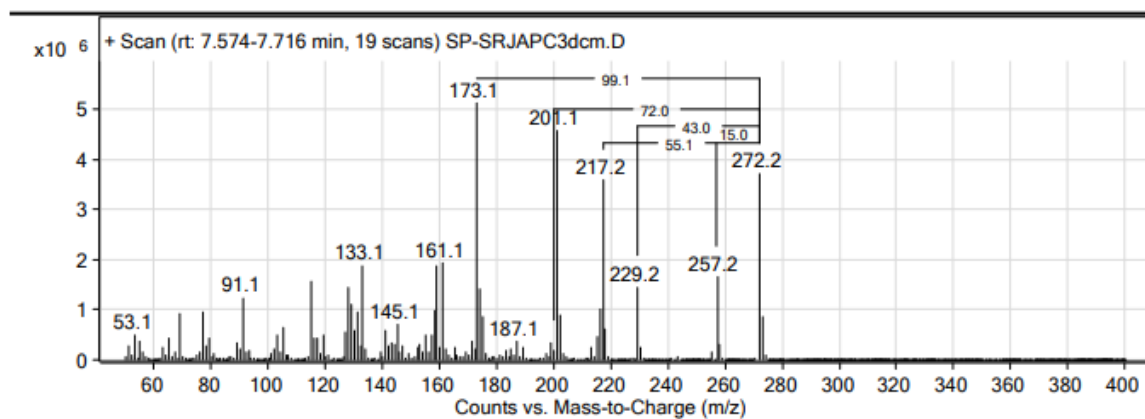

Figure S8. EI-MS Spectrum (70 eV).

**Table S1.** Absorbances obtained in cell membrane stabilization assay.

| Concentration<br>( $\mu\text{g/mL}$ ) | Absorbance        |                   |
|---------------------------------------|-------------------|-------------------|
|                                       | Diclofenac        | DHAP              |
| 400                                   | $0.081 \pm 0.003$ | $0.162 \pm 0.015$ |
| 200                                   | $0.148 \pm 0.002$ | $0.159 \pm 0.004$ |
| 100                                   | $0.100 \pm 0.003$ | $0.109 \pm 0.006$ |
| 50                                    | $0.106 \pm 0.001$ | $0.098 \pm 0.005$ |
| 25                                    | $0.081 \pm 0.004$ | $0.090 \pm 0.007$ |
